# Supplementary material for: Responses of Ephemeral Plants to Precipitation Changes and Their Effects on Community in Central Asia Cold Desert
Source: MDPI journal article supplement (doi:10.3390/plants12152841), 2023-08-01
Supplement: s1 [file s1]

**Supplementary Table S2** The number of edges of the trait network for four species.

|                         | <i>Alyssum linifolium</i> | <i>Erodium<br/>oxyrhinchum</i> | <i>Malcolmia<br/>scorpioides</i> | <i>Hyalea pulchella</i> |
|-------------------------|---------------------------|--------------------------------|----------------------------------|-------------------------|
| Trait                   | Degree                    | Degree                         | Degree                           | Degree                  |
| Survival rate           | 3                         | 5                              | 3                                | 2                       |
| Height                  | 1                         | 1                              | 3                                | 0                       |
| Seed<br>production      | 0                         | 7                              | 5                                | 2                       |
| Leaf area               | 3                         | 5                              | 1                                | 2                       |
| Specific leaf<br>area   | 2                         | 4                              | 0                                | 0                       |
| Hundred-grain<br>weight | 4                         | 2                              | 2                                | 4                       |
| Aboveground<br>biomass  | 1                         | 5                              | 2                                | 3                       |
| Lifetime                | 0                         | 5                              | 2                                | 1                       |
