# Supplementary material for: Responses of Ephemeral Plants to Precipitation Changes and Their Effects on Community in Central Asia Cold Desert
Source: MDPI journal article supplement (doi:10.3390/plants12152841), 2023-08-01
Supplement: s1 [file s1]

**Supplementary Table S1** Summary of a one-way ANOVA showing the effects of different precipitation treatments on four ephemeral plants. Note: \* indicates  $p < 0.05$ .

| Plant traits         | <i>Alyssum linifolium</i> |         | <i>Erodium oxyrhinchum</i> |         | <i>Malcolmia scorpioides</i> |         | <i>Hyalea pulchella</i> |        |
|----------------------|---------------------------|---------|----------------------------|---------|------------------------------|---------|-------------------------|--------|
|                      | df                        | F       | df                         | F       | df                           | F       | df                      | F      |
| Final height         | 2                         | 4.713*  | 2                          | 1.97    | 2                            | 10.95*  | 2                       | 0.12   |
| Lifetime             | 2                         | 1.593   | 2                          | 71.465  | 2                            | 311.727 | 2                       | 0.849  |
| Seed production      | 2                         | 0.01    | 2                          | 16.16*  | 2                            | 31.79*  | 2                       | 18.71* |
| Leaf area            | 2                         | 5.574*  | 2                          | 29.511* | 2                            | 3.72    | 2                       | 4.32*  |
| Specific leaf area   | 2                         | 11.758* | 2                          | 26.111* | 2                            | 0.14    | 2                       | 7.10*  |
| Hundred-grain weight | 2                         | 3.20    | 2                          | 4.30*   | 2                            | 6.00*   | 2                       | 5.21*  |
| Aboveground biomass  | 2                         | 4.28*   | 2                          | 114.84* | 2                            | 9.34*   | 2                       | 4.83*  |
| Importance value     | 2                         | 4.20*   | 2                          | 10.437* | 2                            | 0.01    | 2                       | 0.31   |
