# Supplementary material for: Responses of Ephemeral Plants to Precipitation Changes and Their Effects on Community in Central Asia Cold Desert
Source: MDPI journal article supplement (doi:10.3390/plants12152841), 2023-08-01

Figure S1: Schematic diagram of the experimental design.

Object of study

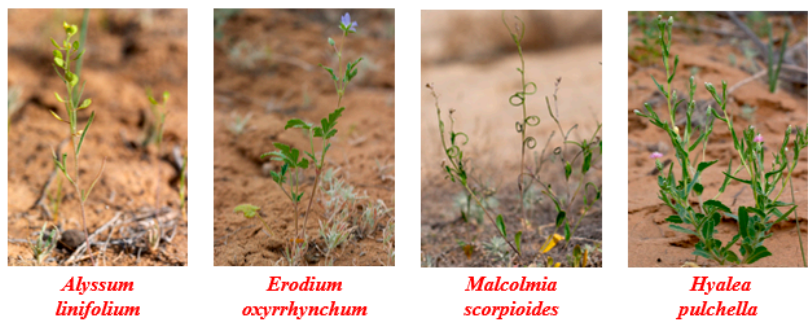

Schematic diagram of the field experiment set-up

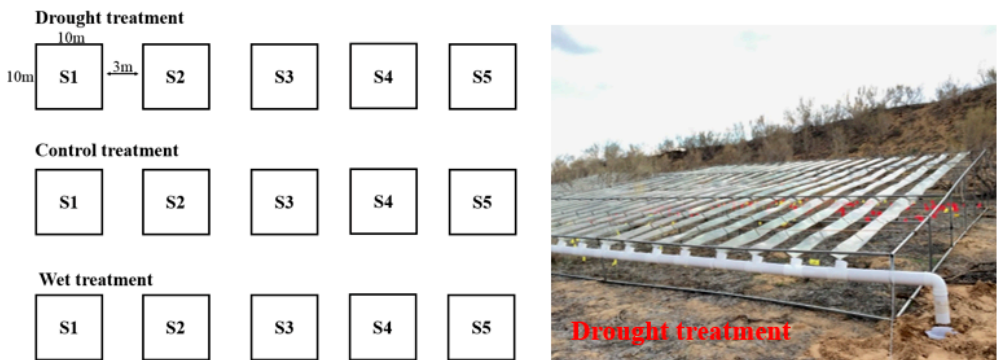

Supplement: s1 [file s1]
